# Supplementary material
Source: Research Square preprint supplement (doi:10.21203/rs.3.rs-9439398/v1)
Supplement: Supplementary file 1 [file 0ec439433dd5abc115337c69.xlsx]

## Sheet: Bell
Bell 2011
methods	Non-randomized, controlled, within-subject crossover study (single-blind placebo followed by double-blind verum)
type of publication	Journal article
duration	4 weeks
setting	Home-based polysomnographic study with university students
number of participants	Placebo: 54; Nux Vomica: 28, Coffea Cruda: 26
inclusion criteria	≥ 3 out of 5 on a rating of global health and give a history of coffee-induced insomnia
exclusion criteria	pregnancy or planning to become pregnant, major psychiatric or serious chronic medical conditions, chronic use of medications other than contraceptive drugs, and/or a history of anaphylactic shock
recruitment methods	Screening of college students in an introductory psychology class at the University of Arizona
health condition	History of coffee-induced insomnia
duration of symptoms	History of coffee-induced insomnia, but specific symptom duration not stated
age range	18‐31 years
gender	placebo/homeopathy 27M/27F (50% female)
Intervention (verum)	Single dose of 30c potency Nux Vomica or Coffea Cruda on night 22
Intervention (control)	Placebo pellets on night 8
Analysis	random effect regression model for analysis, with person as the random effect
Outcome	Total Sleep Time, Stage 2 (minutes), NREM (non-rapid eye movement) sleep, Slow Wave Sleep, Sleep Stage Changes, Awakenings, Arousal Index, Type 2 Arousals, POMS (Profile of Mood Scale) Fatigue, POMS total, Pittsburgh Sleep Quality Index
Funding	National Center for Complementary and Alternative Medicine
Conflict of interest	1 author served as consultant to a homeopathic manufacturer.
Notes
Risk of bias
Bias	Authors' judgement	Support for judgement
Randomization process	Some concern	Missing information on allocation concealment, acceptable randomization method and well-balanced baseline variables.
period and carryover effects	Some concern	Allocation was close to 1:1 (28 vs. 26 participants); slight imbalance unlikely to introduce major period bias. 13 days between one-night intervention of placebo and one-night intervention of verum. Sufficiency of time for washout period to avoid carryover effects remains unclear.
deviations from the intended interventions	Low	The trial was double-blind, there were no deviations due to knowledge of assignment, and the analysis was appropriate for estimating effect of assignment to intervention.
missing outcome data	Some concern	5 of 59 patients enrolled excluded due to not meeting minimum of 4 hours sleep per night.
measurement of the outcome	Low	There is no indication of inappropriate methods in the measurement of the outcome. Outcome measurement appears to have been consistent across interventions, and assessors did not appear to be influenced by knowledge of the interventions.
selection of the reported result	Some concern	There is no pre-specified analysis plan available, but no evidence of selective reporting, undisclosed analytic flexibility, or data exclusion due to carryover. _x000D_
overall	Some concern

## Sheet: Carlini
Carlini 1987
methods	Randomized, double-blind, placebo-controlled, cross-over
type of publication	Journal article
duration	90 days (3 months)
setting	Homeopathic clinics and the Department of Psychobiology, Escola Paulista de Medicina
number of participants	44 patients total (H-group: 25, C-group: 19)
inclusion criteria	Primary complaint of severe insomnia
exclusion criteria	Not explicitly stated
recruitment methods	Patients attending homeopathic clinics were selected based on insomnia complaints
health condition	Insomnia
duration of symptoms	Not explicitly stated
age range	Not explicitly stated
gender	Not explicitly stated
Intervention (verum)	Various homeopathic remedies including Argentum nitricum, Arsenicum album, Bryonia alba, etc.
Intervention (control)	Placebo (30% ethanol solution)
Analysis	Statistical analysis included McNemar test, Mann-Whitney U test, Wilcoxon test, and Fisher's test
Outcome	Sleep onset latency, total sleep duration, sleep quality, night awakenings
Funding	Not reported
Conflict of interest	Not reported
Notes
Risk of bias
Bias	Authors' judgement	Support for judgement
Randomization process	Low	Allocation was likely random and well concealed; no evidence of baseline imbalance.
period and carryover effects	Low	Although groups weren’t perfectly balanced, the analysis method (first-period only) neutralizes both period and carryover concerns, leading to a Low Risk judgment.
deviations from the intended interventions	High	No ITT-analysis was conducted. There was a high number of drop-outs and it is unclear whether this may have impacted the results.
missing outcome data	High	Only 26 out of 44 patients completed the study (40% dropouts at the time of cross-over). No sensitivity analyses or missing data handling methods were reported. Since dropout reasons were not provided, there is a possibility that missingness was related to intervention effects._x000D_
measurement of the outcome	Low	The study used appropriate and consistent methods for measuring the outcome, the assessors were blinded to the interventions, and there is no indication that the measurement was biased.
selection of the reported result	Some concern	Given the absence of a pre-specified analysis plan and insufficient information on multiple analyses, there are some concerns about selective reporting.
overall	High

## Sheet: Harisson
Harisson 2013
methods	Randomized, double-blind, placebo-controlled
type of publication	Journal article
duration	4 weeks
setting	Homeopathy Health Clinic, University of Johannesburg, South Africa
number of participants	Total: 28 (H-group: 14, C-group: 14)
inclusion criteria	Males aged 18-40 years with chronic primary insomnia at least 3 times a week for at least 1 month but not more than 10 years
exclusion criteria	Consumption of medications, recreational drugs, more than 20 units of alcohol; depressive, mental or psychiatric disorders; sleep disorders (restless leg syndrome, narcolepsy, obstructive sleep apnoea); medical disorders where pain/discomfort is concormitant to insomnia
recruitment methods	Referrals from a registered clinical psychologist and advertisements at the university campus clinic and internet-based platforms
health condition	Chronic primary insomnia with sleep onset issues due to hyperarousal or learned sleep-preventing associations
duration of symptoms	at least 3 times a week for a minimum of one month and a maximum of ten years control group with an average insomnia duration of 57.5 months, and the experimental group had 55.71 months​
age range	18-40 years (mean age: Placebo: 25.4 years, Experimental: 29.9 years)
gender	only males
Intervention (verum)	The homeopathic complex with 8 remedies (Ambra grisea 6cH, Arsenicum album 6cH, Coffea cruda 6cH, Delphinium staphisagria 6cH, Ignatia amara 6cH, Lycopodium clavatum 6cH, Passiflora incarnata 6cH, Valeriana officinalis 6cH), dispensed in 30ml bottles (20% alcohol solution), dosage: 5 drops under the tongue twice daily (before supper and before bed).
Intervention (control)	Placebo identical in appearance, taste, and alcohol content to the homeopathic complex​
Analysis	Mann-Whitney test for descriptive analyses, Friedman and linear regression test for within group differences, Wilcoxon paired test for week differences
Outcome	Sleep onset latency Total sleep time Number of awakenings Quality of sleep Daytime fatigue Cognitive and physiological arousal levels (measured via Pre-Sleep Arousal Scale)​
Funding	not reported
Conflict of interest	not reported
Notes
Risk of bias
Bias	Authors' judgement	Support for judgement
Randomization process	Low	All criteria for low risk are satisfied: random allocation, allocation concealment, and no meaningful baseline imbalances. The randomization process appears appropriate and well-executed.
deviations from the intended interventions	High	Although participants and caregivers were blinded and no protocol deviations were reported, the use of a per-protocol analysis without ITT and the exclusion of 17.6% of participants post-randomization introduces the possibility of bias.
missing outcome data	High	There is substantial missing data with no attempt to correct for it. The reasons for dropout are likely related to the true outcome (insomnia severity), and per-protocol analysis excludes these cases entirely, introducing high risk of bias.
measurement of the outcome	Low	Valid and appropriate outcome measures were used. Measurement methods were consistent across groups, and blinding of participants was preserved, minimizing risk of differential measurement or assessment bias.
selection of the reported result	Some concern	While the outcome measurement was appropriate and consistently applied, the absence of a pre-specified analysis plan or protocol and the lack of transparency regarding potential alternative analyses leads to some concerns about selective reporting bias.
overall	High

## Sheet: Jong
Jong 2016
methods	Randomized, open-label, placebo-controlled
type of publication	Journal article
duration	4 weeks (28 days)
setting	five outpatient pediatric clinics in Russia​
number of participants	ZinCyp-3-02 group: 90 (88) children; Control (glycine) group: 90 (88) children enrolled (completed study)
inclusion criteria	up to six years, sleep disorders which manifested in difficulties falling asleep and maintaining sleep, present for at least one month prior to study start
exclusion criteria	sleep disorders associated with somatic or psychic diseases and intracranial hypertension or in case of severe concomitant diseases (renal failure, heart anomalies, circulatory failure, cardiomyopathy, decompensated kidney and liver, immunosuppressive conditions, and oncological diseases), known or suspected hypersensitivities to the components of the study medications, other medications within t…
recruitment methods	not specified
health condition	Sleep disorders in children, including difficulties falling asleep and maintaining sleep
duration of symptoms	inclusion if sleep disorders had lasted for at least 1 month; mean values: <1 year group: ~2.2 months; 1-3 years group: ~7.8–8.0 months; ≥4 years group: ~7.7–8.2 months
age range	Children ≤6 years old
gender	ZinCyp-3-02 group: 37 girls (41.6%), Control (glycine) group: 39 girls (43.3%)​
Intervention (verum)	ZinCyp-3-02 tablets: Ingredients: Cypripedium pubescens D4, Magnesium carbonicum D10, Zincum valerianicum D12; Dosage: 1 tablet four times a day; For children <3 years: Tablets dissolved in water
Intervention (control)	Glycine tablets (100 mg per tablet): Dosage for 3-6 years: 1 tablet twice daily; For <3 years: Half a tablet twice daily for two weeks, then half a tablet once daily​
Analysis	ITT analysis, primary analysis methodwas a proportional odds model (POM) taking into account study specific situation of repeatedly measured outcome. Secondary outcomes presented as descriptive statistics.
Outcome	Primary outcome: Change in total complaints severity score. Secondary outcomes: Sleep onset latency complaint, Sleep duration complaint, Troubled sleep, Physical inactivity after awakening complaint, Restlessness complaint, Sleep disorders frequency, Integrative medicine outcome scale
Funding	Deutsche Homöopathie-Union, DHU-Arzneimittel GmbH & Co. KG, Karlsruhe, Germany
Conflict of interest	1 author had been employee of DHU, a manufacturer of homeopathic medicinal products before the study, 2 authors were employees of DHU during the study, 1 author received a fee from DHU.
Notes
Risk of bias
Bias	Authors' judgement	Support for judgement
Randomization process	Low	Random sequence generation and concealment were both adequate. The open-label nature affects other domains (e.g., performance bias), not this one.
deviations from the intended interventions	Low	no significant deviations from the assigned intervention and no evidence suggesting changes to the intervention due to the trial context
missing outcome data	Low	study employed Intention-to-Treat (ITT) analysis, dropout rate was low.
measurement of the outcome	High (Low)	study was open-label, meaning the outcome assessors were aware of the treatment group allocation. This could have introduced high bias, especially given the subjective nature of the outcome. (For adverse events: low risk of bias)
selection of the reported result	Low	Statistical analysis confirming planned outcomes and analyses, the concern about selective reporting is minimal.
overall	High	for adverse events: low risk of bias.

## Sheet: Hejazi
Hejazi 2012
methods	Randomized, single-blind, placebo-controlled
type of publication	Conference abstract
duration	4 weeks
setting	University-based setting
number of participants	90 total (H-group: 45, C-group: 45)
inclusion criteria	Students suffering from insomnia
exclusion criteria	Not reported
recruitment methods	Volunteer sampling method
health condition	Insomnia
duration of symptoms	Not reported
age range	University students (exact age range not reported)
gender	Not reported
Intervention (verum)	Coffea cruda (homeopathic remedy), one capsule one hour before sleep every night and one drop every 8 hours
Intervention (control)	Valeriana officinalis (herbal medicine), one capsule one hour before sleep every night and one drop every 8 hours
Analysis	"descriptive and inferential statistics"
Outcome	Sleep quality and severity assessed via Petersburg Sleep Quality Index and Standard Insomnia Severity Index
Funding	Not reported
Conflict of interest	Not reported
Notes
Risk of bias
Bias	Authors' judgement	Support for judgement
Randomization process	Some concern	The study states that participants were "randomly allocated," but no details are provided on how randomization was conducted._x000D_ No information regarding the concealment. No baseline comparison is reported.
deviations from the intended interventions	High	Single-blind design means participants and deliverers likely aware of intervention; no information on protocol deviations or ITT analysis.
missing outcome data	High	No information on missing data or dropout; cannot determine bias impact.
measurement of the outcome	Some concern	Validated instruments used; however, participants (unblinded) self-reported outcomes, increasing risk of bias.
selection of the reported result	Some concern	No mention of pre-registration or a statistical analysis plan._x000D_ Only final results were reported, with no mention of other possible analyses._x000D_ No evidence for multiple analyses.
overall	High

## Sheet: Kolia-Adams
Kolia-Adams 2010
methods	Randomized, double-blind, placebo-controlled
type of publication	thesis
duration	4 weeks
setting	University of Johannesburg Health Clinic
number of participants	Experimental group (Coffea cruda 200cH): 15 Control group (Placebo): 15
inclusion criteria	• insomnia for no longer than a year, • insomnia associated with nervous excitability
exclusion criteria	• taking prescribed medication for insomnia, • taking over the counter medication for insomnia more than 3 times a week, • insomnia as treatment side effect or due to obstructive sleep apnoea, restless leg syndrome, depression or narcolepsy, • participants suffering from chronic diseases and taking chronic medication
recruitment methods	newspapers, pamphlets, emails, shopping malls, university campuses, and a local radio station
health condition	insomnia (associated with nervous excitability which manifested as a difficulty in falling asleep)
duration of symptoms	no longer than a year
age range	18-50 years
gender	Coffea cruda group: 10 women (66.7%), Placebo group: 13 women (86.7%)​
Intervention (verum)	Treatment: Coffea cruda 200cH Usage/dosage: patients received 50ml bottle of medication in liquid form, were requested to shake the bottle and then take 10 drops under the tongue just before going to bed
Intervention (control)	Identical in appearance and dosage regimen to Coffea cruda 200cH
Analysis	General Linear Model: Repeated Measures, Mann-Whitney test (non-parametric test), Cross-tabulation, Fisher’s exact test, regression analysis
Outcome	Duration of sleep Sleep satisfaction Change in sleep patterns
Funding	not reported
Conflict of interest	not reported
Notes
Risk of bias
Bias	Authors' judgement	Support for judgement
Randomization process	Some concern	While allocation concealment was probably adequate, the absence of information about random sequence generation combined with notable baseline imbalances (in sex and age) leads to some concerns about the randomization process.
deviations from the intended interventions	Some concern	The trial-maintained blinding of participants and personnel, no deviations due to trial context were identified, but it is not clear whether all randomized participants were analysed.
All outcomes
missing outcome data	Low	There is no evidence of missing outcome data. All randomized participants were included in the analysis. No risk of bias due to missing data.
measurement of the outcome	Low	The outcome measurement is appropriate, used consistently across groups, and blinding was maintained. Participants, as outcome assessors, were unaware of their group allocation, which minimizes the chance of bias in reporting.
All outcomes
selection of the reported result	Some concern	The lack of protocol, registration, or analysis plan introduces possibility of selective reporting.
All outcomes
overall	Some concern

## Sheet: Michael
Michael 2019
methods	Randomized, double-blind, placebo-controlled
type of publication	Journal article
duration	3 months
setting	out-patient departments of National Institute of Homoeopathy, India
number of participants	Treatment group: 30 (30) allocated (analyzed) participants Placebo group: 30 (30) allocated (analzyed) participants
inclusion criteria	chronic insomnia (ICD F51, G 47.0), male/female patients, age between 18 and 65 years, written consent
exclusion criteria	uncontrolled systemic illness or life-threatening infections, cases already undergoing homeopathic treatment for any chronic disease, substance abuse and/or dependence, pregnant or lactating women, patients with psychiatric diseases and self-reported immune-compromised states
recruitment methods	patients attending the out‐patient department
health condition	chronic insomnia (ICD F51, G 47.0)
duration of symptoms	Duration of symptoms > 3 months
age range	18‐65 years
gender	H-group: 13 (43%) females; C-group: 18 (60%) females
Intervention (verum)	The intervention involved administering individualized homeopathic medicines in centesimal or 50 millesimal potencies based on the patient’s condition. Centesimal doses consisted of four cane sugar globules (no. 30) moistened with the prescribed medicine in ethanol, with repetition based on individual needs. In the 50 millesimal scale, a single medicated globule (no. 10) was dissolved in distille…
Intervention (control)	Centesimal doses consisted of four cane sugar globules (no. 30) moistened with rectified spirit, visually identical to the medicine. In the 50 millesimal scale, a non-medicated globule (no. 10) was dissolved in distilled water with ethanol, with 16 marked doses. Each 5 ml dose was taken after specific dilution and agitation, orally on an empty stomach. Dosage and instructions matched those in the…
Analysis	intention-to-treat, last observation carried forward and multiple imputations using linear regression model
Outcome	• Insomnia Severity Index (ISI) • Sleep diary - ‘Latency to fall asleep’ [item 1], - ‘Minutes awake in the middle of the night’ [item 2], - ‘Minutes awake too early’ [item 3], - ‘Hours spent in Bed’ [item 4], - ‘Total Sleep Time in hours’ [item 5], - ‘Sleep Efficiency’ [item 6]
Funding	no funding
Conflict of interest	no conflict
Notes
Risk of bias
Bias	Authors' judgement	Support for judgement
Randomization process	Low	All the signaling questions answered favorably; no evidence of bias from the randomization process.
deviations from the intended interventions	Low	The trial used adequate blinding of both participants and intervention deliverers, followed the intention-to-treat principle, and correctly handled missing data. The procedures appear to have been rigorously followed, with no significant deviations or failures that could meaningfully bias the results.
All outcomes
missing outcome data	Low	Small dropout rate (8.33%), evenly distributed between groups, ITT analysis applied, no indication that missing data is related to the outcome’s true value.
measurement of the outcome	Low	The outcome measures were valid and consistently applied. Although the outcomes were self-reported, blinding was in place, and the participants likely did not know which group they were in.
All outcomes
selection of the reported result	Low	The analysis followed pre-specified statistical methods (ITT approach, handling missing data appropriately). There was no evidence of selective reporting based on statistical significance.
All outcomes
overall	Low

## Sheet: Naude
Naude 2010
methods	Randomized, double-blind, placebo-controlled
type of publication	Journal article
duration	4 weeks
setting	Durban University of Technology (DUT) Homeopathic Day Clinic in Durban, South Africa
number of participants	Treatment group: 16 (14) allocated (analyzed) participants Placebo group: 17 (16) allocated (analzyed) participants
inclusion criteria	diagnostic criterion 307.42 Primary Insomnia according to Diagnostic and Statistical Manual of Mental Disorders (DSM), 4th edition
exclusion criteria	using additional sleep aids, interventions or medication
recruitment methods	Convenience sampling following advertisements placed in local press; the first thirty consenting participants who met inclusion criteria were recruited
health condition	Chronic primary insomnia meeting DSM-IV TR (2000) criterion 307.42 Primary Insomnia
duration of symptoms	At least 1 month (as per DSM-IV definition of chronic primary insomnia)
age range	20-58 years
gender	Treatment group: 5 females (35.7%) Placebo group: 6 females (37.5%)
Intervention (verum)	Individualized homeopathic simillimum based on repertorization of the totality of symptoms Administered as three single dose lactose powder sachets per consultation Each active sachet contained 10 medicated lactose granules placed in lactose powder Granules were triple impregnated (1% v/v) with centesimal potencies in 96% ethanol Various potencies used: 30CH (23 doses), 200CH (63 doses), 1M (38 d…
Intervention (control)	Placebo powder sachets containing lactose powder and 10 lactose granules impregnated with 96% ethanol alone Indistinguishable from active sachets in appearance and taste Same administration protocol as verum treatment
Analysis	Non-parametric statistical tests (Wilcoxon’s Signed Rank Test and Kruskal–Wallis Tests)
Outcomes	Total hours slept per week Sleep Impairment Index (SII): summary scores
Funding	not reported
Conflict of interest	not reported
Notes
Risk of bias
Bias	Authors' judgement	Support for judgement
Randomization process	Low	Valid randomization, probable concealment, and no significant baseline imbalances indicate low risk of bias.
deviations from the intended interventions	High	Despite randomization, participants who dropped out were excluded from the analysis, which could lead to bias if these participants differ from those who completed the study. The risk of substantial impact remains unclear.
missing outcome data	Low	Outcome data were available for all analyzed participants, with no indication of selective loss or differential dropout.
measurement of the outcome	Low	Appropriate and validated tools were used; outcome assessment was blinded and consistent across groups.
selection of the reported result	Some concern	Lack of a pre-specified analysis plan and insufficient transparency on outcome and analysis selection introduces possibility of selective reporting.
overall	High

## Sheet: Prajakta
Prajakta 2024
methods	Randomized, single-blind, placebo-controlled
type of publication	Journal article
duration	6 weeks
setting	Outpatient department
number of participants	Treatment group: 15, Placebo group: 16
inclusion criteria	Patients aged 20-45 years with symptoms of primary insomnia
exclusion criteria	Systemic illnesses, hypothyroidism, hyperthyroidism, recent surgery, narcolepsy, sleep apnea, psychiatric disorders, substance abuse
recruitment methods	Not reported
health condition	primary insomnia (307.42; DSM-IV-TR)
duration of symptoms	Not reported
age range	20-45 years
gender	18 females (60% total), specific arm-wise distribution not provided
Intervention (verum)	Constitutional homeopathic medicine (most frequently Arsenicum album, Nux vomica, Kali phosphoricum, Coffea cruda, and Argentum nitricum) prescribed every 15 days in required potency (200C and 1M commonly used) and remedial measures (see control)
Intervention (control)	Placebo with remedial measures (Stimulus Control Therapy and Sleep Restriction Therapy)
Analysis	intention-to-treat analysis, paired and unpaired t-tests
Outcome	Sleep quality (Pittsburgh Sleep Quality Index)
Funding	Not reported
Conflict of interest	no conflict
Notes
Risk of bias
Bias	Authors' judgement	Support for judgement
Randomization process	Some concern	The method of randomization is probably appropriate, but lack of allocation concealment details and absence of baseline group comparison data introduce uncertainty.
deviations from the intended interventions	High	Although participants were blinded and deviations were unlikely, the analysis was not intention-to-treat principle, and data on dropouts were excluded. The risk of substantial impact remains unclear.
missing outcome data	Some concern	Missing data exceeds 5%, and no imputation or ITT was used. However, dropout was balanced and likely unrelated to outcome, and there's no strong evidence of bias.
measurement of the outcome	Some concern	While the PSQI is an appropriate tool, the possible knowledge of the intervention by outcome assessors in this single-blind study introduces some risk of bias, though it's probably not substantial.
selection of the reported result	Some concern	The lack of clear transparency on the detailed analysis plan and multiple analyses
overall	High

## Sheet: Colombo
Colombo 2003
methods	Non-randomized, controlled study
type of publication	Conference proceedings
duration	90 days
setting	Multicenter pediatric practices
number of participants	120 patients total (H-group: 60, C-group: 60)
inclusion criteria	Children aged 6 months - 3 years, repeated night awakenings or 1 prolonged awakening >30 min, primary central insomnia
exclusion criteria	Children with secondary insomnia (related to organic pathology), children with 1 awakening <30 min
recruitment methods	Not reported
health condition	Pediatric insomnia
duration of symptoms	Not reported
age range	6 months - 3 years
gender	H-group: 34 girls (56.6%), C-group: 28 girls (46.6%)
Intervention (verum)	ABBE CHAUPITRE N°7 (homeopathic complex) administered based on age group
Intervention (control)	Niaprazine (standard treatment) administered based on weight
Analysis	Not reported
Outcome	Number of awakenings, duration of awakenings, side effects
Funding	Not reported
Conflict of interest	Not reported
Notes
Risk of bias
Single domains not assessed as judged to have a critical risk of bias in the pre-analysis of ROBINS-I.
There is sufficient potential for confounding to not further consider unadjusted effect estimates. Factors like parental sleep habits, child’s bedtime routine, psychological stress, and dietary factors (e.g., caffeine consumption) are not discussed as potential sources of bias. Baseline group comparisons are not provided.

[truncated: 2 more sheets: Prosper, Waldschuetz]
