# Supplementary material
Source: Research Square preprint supplement (doi:10.21203/rs.3.rs-9439398/v1)
Supplement: Supplementary file 2 [file 39b6e861c1fe90a828aebeaf.xlsx]

## Sheet: InSynQ
InSynQ no.	task	detail	DORMEO
1	Specify population and intervention groups to be used in the synthesis	● Label each group. ● Define each group in enough detail to replicate decisions about which intervention (or population) group(s) each study is eligible for. Where the definitions are based on an established source (e.g. a taxonomy of interventions), it may be sufficient to identify and reference the source. ● If your review includes studies with multi-component interventions, specify how these w…	●Two groups will be compared in the review: patients suffering from sleeping disorders treated with homeopathy and patients treated with interventions other than homeopathy. ●The review may include multi-component interventions where homeopathy is used as an add-on therapy and compared to the same therapy which will be included in the analysis and excluded in sensitivity analysis. ●We plan to inc…
2	Specify outcome groups to be used in the synthesis.	● Label each outcome group. ● Define each outcome group (i.e. ‘what is being measured’) in enough detail to enable eligible outcomes from each included study to be categorised. ● Specify the measurement methods or tools/scales that provide an appropriate assessment of the domain (i.e. ‘how the outcome is measured’). ● Specify the time frame of the outcome group (i.e. ‘when the outcome is measured…	see 'synthesis plan'
3	Give a rationale for the groups	● For each PICO element, describe the basis for grouping with a rationale. ● If grouping is based on an existing system (e.g. a published conceptual framework, taxonomy or core outcome set, or other reviews), identify and reference the source, noting any adaptations made for the review. ● Consider presenting a logic model or figure to provide a visual summary of the links between the different PI…	Insomnia disorders included are in accordance with the ICD‐11 classification 7A00, 7A01, 7A0Z (see WHO 2024, https://icd.who.int/browse/2024-01/mms/en#1359329403) which are characterised by the persistent difficulty with sleep initiation, duration, consolidation, or quality, resulting in daytime impairment such as fatigue, depressed mood or cognitive impairment. Other types of sleep-wake disorder…
4	Identify the role of each group in the synthesis	● Identify which of the specified groups will form the basis of comparisons and any groups that will be used to stratify studies within the comparisons. ● If applicable, identify which of the specified groups will be used to explore possible causes of variation in the effects of an intervention (e.g. in subgroup analyses or meta-regression). ● If applicable, identify which of the specified groups…	We will include all patients and compare the following subgroups: age: adults, adolescents (16+) vs. children (0-15 years), intervention: complex vs. single remedies, intervention: individualized vs. non-individualized homeopathy. The robustness of the analyses will be tested in sensitivity analyses regarding the risk of bias (low vs. moderate, high).
5	Specify the pairwise comparisons that will be made between intervention groups	● Specify all of the comparisons to be made between intervention groups (including controls) ● Specify the order of importance of the comparisons or state that there is no order of importance. ● Specify whether co-interventions will be included in the same or separate comparisons. ● Provide a rationale for the selected comparisons (when these are a subset of all possible comparisons).	The following comparisons will be made: 1. Any type of homeopathy vs. placebo 2. Any type of homeopathy (monotherapy) vs. active control 3. Any type of homeopathy (add-on to control) vs. active control 4. Any type of homeopathy vs. no treatment Subgroup analyses: see #4.
6	Ensure that the Objectives align with the questions addressed in the synthesis	● Ensure that the objectives cover the questions addressed in the synthesis in sufficient detail to match the objectives to the corresponding syntheses. ● Use consistent wording (terminology) across all sections of the review where the questions addressed in the synthesis are reported, including in the objectives.	Primary objectives: ● To compare the effectiveness of homeopathy with different controls for sleeping disorders ● To compare the efficacy of homeopathy with different controls for sleeping disorders ● To assess the safety of homeopathy compared to different control for sleeping disorders ● To analyze aspects of the intervention complexity by subgroup analyses
7	Specify methodological groups to be used in the synthesis.	● Provide the basis for grouping with a rationale. ● Label each methodological group. ● Define each methodological group in enough detail to enable classification of studies into groups. ● Describe the role of the methodological groups in the synthesis.	To capture the intervention complexity and the comparative effectiveness, efficacy and safety of homeopathy, we consider both, prospective non-randomized studies of interntions (either objective or experimental) and randomized controlled trials. The study types will be analyzed separately and combined only as indicated in Figure 24.1.a Cochrane Handbook of Systematic Reviews.
8	Identify how patients, the public and other stakeholders informed the development of questions to be addressed in the synthesis	● Describe how patients and the public, and other stakeholders, informed the development of questions (ideally using the constructs of the ACTIVE the framework). If there was no PPI or other stakeholder involvement, state this.	See template protocol and protocol
9	Describe the processes used to decide which studies were eligible for each synthesis	● Describe the processes to be used to decide which studies were eligible for each synthesis (such as tabulating the study intervention characteristics and comparing against the planned groups for each synthesis.	Given the complexity of the interventions being investigated, we attempted to categorize the included interventions along six dimensions: (1) study type; (2 )placebo-controlled vs. actively controlled; (3) single vs. complex remedy; (4) individualized vs. non-individualized; (5) adults vs. children; (6) chronic insomnia vs. non-chronic insomnia. Outcomes were pooled for RCTs and NRSIs and for the…
10	Identify changes made at review stage to the groups or comparisons reported in the protocol	● Label and define any groups used in the review that were not reported in the protocol. ● List any comparisons made in the review that were not reported in the protocol. ● Provide a rationale for any changes made during the review to the planned groups or comparisons.	We planned the above groups/subgroups. After considering the studies included in this review, we revised the comparisons, so that analyses would be performed for RCTs and NRSI separately (plus sensitivity analyses including the study of Bell (2011) - not randomized, but with a within subject crossover design). We also conducted separate analyses for adults and children. There was only one study (…
11	Report the results in accordance with the groups and comparisons specified in the methods	● Report using the same groups and comparisons as specified in the methods. ● Report using the same group labels.	see manuscript, SoF tables

## Sheet: synthesis plan
Main outcome category	Outcome type	Outcome measure	Carlini	Harisson	Hejazi	Jong	Kolia-Adam	Michael	Naude, Maharaj	Prajakta	Bell	Colombo	Prosper	Waldschuetz
1. Sleep-related outcomes	Total sleep time	sleep diary, polysomnography	P	P			P	P	P		P			Valerian
	Sleep Onset Latency	sleep diary, polysomnography, complaints	P	P				P
	Sleep Quality	Pittsburgh Sleep Quality Index	P	P	Valerian					P	P
	Insomnia severity	Insomnia severity index, insomnia severity complaint score			Valerian	Glycine		P	P
	Sleep Efficiency	sleep diary						P						Valerian
	Number of Awakenings	sleep diary, polysomnography									P	Niaprazine		Valerian
	Physiological arousal during sleep	Polysomnography									P
	Arousal levels (subjective)	Pre-Sleep Arousal Scale		P
	NREM (non-rapid eye movement) sleep										P
	Slow Wave Sleep										P
	Sleep Stage Changes										P
	Sleep disorders frequency					Glycine
	Sleep satisfaction						P		P
	Change in sleep patterns						P
	minutes awake too early							P
	duration of awakenings								P			Niaprazine
	hours spent in bed							P
	tossing and turning													Valerian
	Sleep disorder symptoms (insomnia, irritability, anxiety, sadness, crying, aggression)												conventional
	Dysfunctional Beliefs and Attitudes about Sleep Scale								P
	Overall symptom reduction			P			P	P	P	P
2. Daytime Functioning Outcomes	Daytime Sleepiness, Fatigue			P			P							Valerian
	Daytime Effectiveness													Valerian
3. Safety, tolerability	Adverse Events (AEs)					Glycine		P				Niaprazine	conventional	Valerian
	tolerability					Glycine
4. Others	Patient Global Impression of Change
	POMS (Profile of Mood Scale) Fatigue										P
	POMS total										P
	Integrative Medicine Outcome Scale					Glycine
	Recurring thouth patterns													Valerian
Subgroup category
RCT, NRSI			RCT	RCT	RCT	RCT	RCT	RCT	RCT	RCT	NRSI	NRSI	NRSI	NRSI
single vs. complex remedy			single	complex	single	complex	single	single	single	single	single	complex	single	complex
individualized vs. not individualized			indi	not	unclear	not	not	indi	indi	indi	indi	not	individualized	not
adults, children			unclear	adults	unclear	children	adults	adults	adults	adults	adults	children	adults	adults
intervention duration			12	4	4	4	4	12	4	6	4	12	26	4
chronic insomnia			unclear	yes	unclear	no	unclear	yes	yes	unclear	no	no	unclear	unclear
RoB			high	high	high	high	some concern	low	high	high	some concern	critical	critical	high
comments
Legend
	included in analysis
	not included in analysis (missing data; critical risk of bias)
P	reported outcome, placebo-controlled, not included in analysis (no predefined outcome)
Valerian	available outcome, Valerian as control, included in analysis
