# Supplementary material
Source: Research Square preprint supplement (doi:10.21203/rs.3.rs-9439398/v1)
Supplement: Supplementary file 2 [file 64dc4314bc2313e0b22c8c35.docx]

**Supplement 9**

**MVHT Consensus**

| Study | Domain I | Domain II | Domain III | Domain IV | Domain V | Domain VI | Overall MVHT |
| --- | --- | --- | --- | --- | --- | --- | --- |
| Carlini 1987 | Unclear | Unclear | Yes | Unclear | Yes | Yes | Uncertain |
| Harrison 2013 | Unclear | Unclear | Yes | Yes | Yes | Yes | Uncertain |
| Hejaji 2012 | Yes | Yes | Unclear | Yes | Unclear | Yes | Uncertain |
| Jong 2016 | Unclear | Unclear | Unclear | Yes | Yes | Yes | Uncertain |
| Kolia-Adam 2010 | Yes | Yes | Yes | Yes | Yes | Yes | Acceptable |
| Michael 2019 | Yes | Yes | Yes | Yes | Yes | Yes | Acceptable |
| Naudé 2010 | Yes | Yes | Unclear | Yes | Yes | Yes | Acceptable |
| Prajakta 2024 | Yes | Yes | Unclear | Yes | Yes | Yes | Acceptable |
| Bell 2011 | Yes | Yes | Yes | Yes | Yes | Yes | Acceptable |
| Colombo 2003 | Unclear | No | Yes | Yes | Yes | Yes | Inadequate |
| Prosper 2016 | Unclear | Unclear | Unclear | Unclear | Unclear | Yes | Uncertain |
| Waldschuetz 2008 | Unclear | Unclear | No | Yes | Yes | Yes | Inadequate |

**RITES Consensus**

| Study | Participants’ Characteristics ( | Trial Setting | Flexibility of Interventions | Clinical Relevance of Interventions | Average Score |
| --- | --- | --- | --- | --- | --- |
| Carlini 1987 | 4 | 5 | 5 | 2 | 4 |
| Harisson 2013 | 1 | 3 | 2 | 1 | 1.75 |
| Hejazi 2012 | 2 | 1 | 1 | 3 | 1.75 |
| Jong 2016 | 2 | 1 | 1 | 2 | 1.5 |
| Kolia-Adam 2010 | 1 | 1 | 2 | 1 | 1.25 |
| Michael 2019 | 2 | 2 | 5 | 1 | 2.5 |
| Naudé 2010 | 4 | 1 | 4 | 1 | 2.5 |
| Prajakta 2024 | 1 | 4 | 5 | 1 | 2.75 |
| Bell 2011 | 1 | 1 | 1 | 1 | 1 |
| Colombo 2003 | 2 | 5 | 1 | 5 | 3.25 |
| Prosper 2016 | 5 | 5 | 4 | 4 | 4.5 |
| Waldschuetz 2008 | 4 | 5 | 2 | 4 | 3.75 |
