# Supplementary material
Source: Research Square preprint supplement (doi:10.21203/rs.3.rs-9439398/v1)
Supplement: Supplementary file 9 [file b5a4b3b4065761b210e42e2a.docx]

**Supplement 1:** HOM-A template protocol, with insomnia-specific adaptations

**Supplement 2:** Literature Search Strategy for Different Databases

**Supplement 3:** Study Eligibility Criteria

**Supplement 4:** Details of studies excluded after full-text screening, including reasons for exclusion, and Data Handling Decisions

**Supplement 5:** Codebook

**Supplement 6:** Intervention Synthesis Questions (InSynQ) framework checklist and synthesis plan

**Supplement 7:** Study Characteristics Data

**Supplement 8:** Risk of Bias and Meta-analysis

**Supplement 9:** MVHT and RITES assessments

**Supplement 10:** Details of iCAT assessment

**Supplement 11:** Certainty of Evidence for Outcomes in Adults

**Supplement 12:** Certainty of Evidence for Outcomes in Children

**Supplement 13:** Plain Language Summary
