# Supplementary material
Source: Research Square preprint supplement (doi:10.21203/rs.3.rs-9439398/v1)
Supplement: Supplementary file 10 [file a52ebb05f17c138ef3db3693.xlsx]

## Sheet: Overview
Key questions	%	studies
number of active components in the intervention (modified iCAT_SR question 1)	1	10
1 component	0.5	5
bundle of components	0.3	3
multiple components	0.1	1
unclear	0.1	1
degree of tailoring intended across individuals in applying the intervention (modified iCAT_SR question 4)	1	10
clinical, complex/multi-constituents remedies	0.3	3
clinical, single-constituents (one remedy only)	0.1	1
clinical, isopathy	0	0
partly individualized (selection from predefined list or restricted change during time)	0.1	1
fully individualized	0.3	3
mixed	0	0
unclear	0.2	2
level of skill required by those delivering the intervention (modified iCAT_SR question 5)	1	10
basic skills	0.4	4
intermediate level skills	0.1	1
highly level skills	0.4	4
unclear/unable to assess	0.1	1
degree of interaction between intervention components (e.g. homeopathic remedy and the patient-therapist relation) (modified iCAT_SR question 7)	1	10
independent	0.4	4
moderate interaction	0.1	1
high level interaction	0.4	4
unclear/unable to assess	0.1	1
degree to which the effects of the interventions are changed by recipient or provider factors (modified iCAT_SR question 9)	1	10
largely independent of individual-level factors	0.4	4
moderately dependent of individual-level factors	0.1	1
highly dependent of individual-level factors	0.4	4
unclear/unable to assess	0.1	1

## Sheet: Questions
Questions from the codebook:
